# Supplementary material for: Predicting new indications of compounds with a network pharmacology approach: Liuwei Dihuang Wan as a case study
Source: PubMed Central journal article supplement (PMC5706847; doi:10.18632/oncotarget.21398), 2017-09-30
Supplement: oncotarget-08-93957-s001.pdf [file oncotarget-08-93957-s001.pdf]

## Predicting new indications of compounds with a network pharmacology approach: Liuwei Dihuang Wan as a case study

### SUPPLEMENTARY MATERIALS

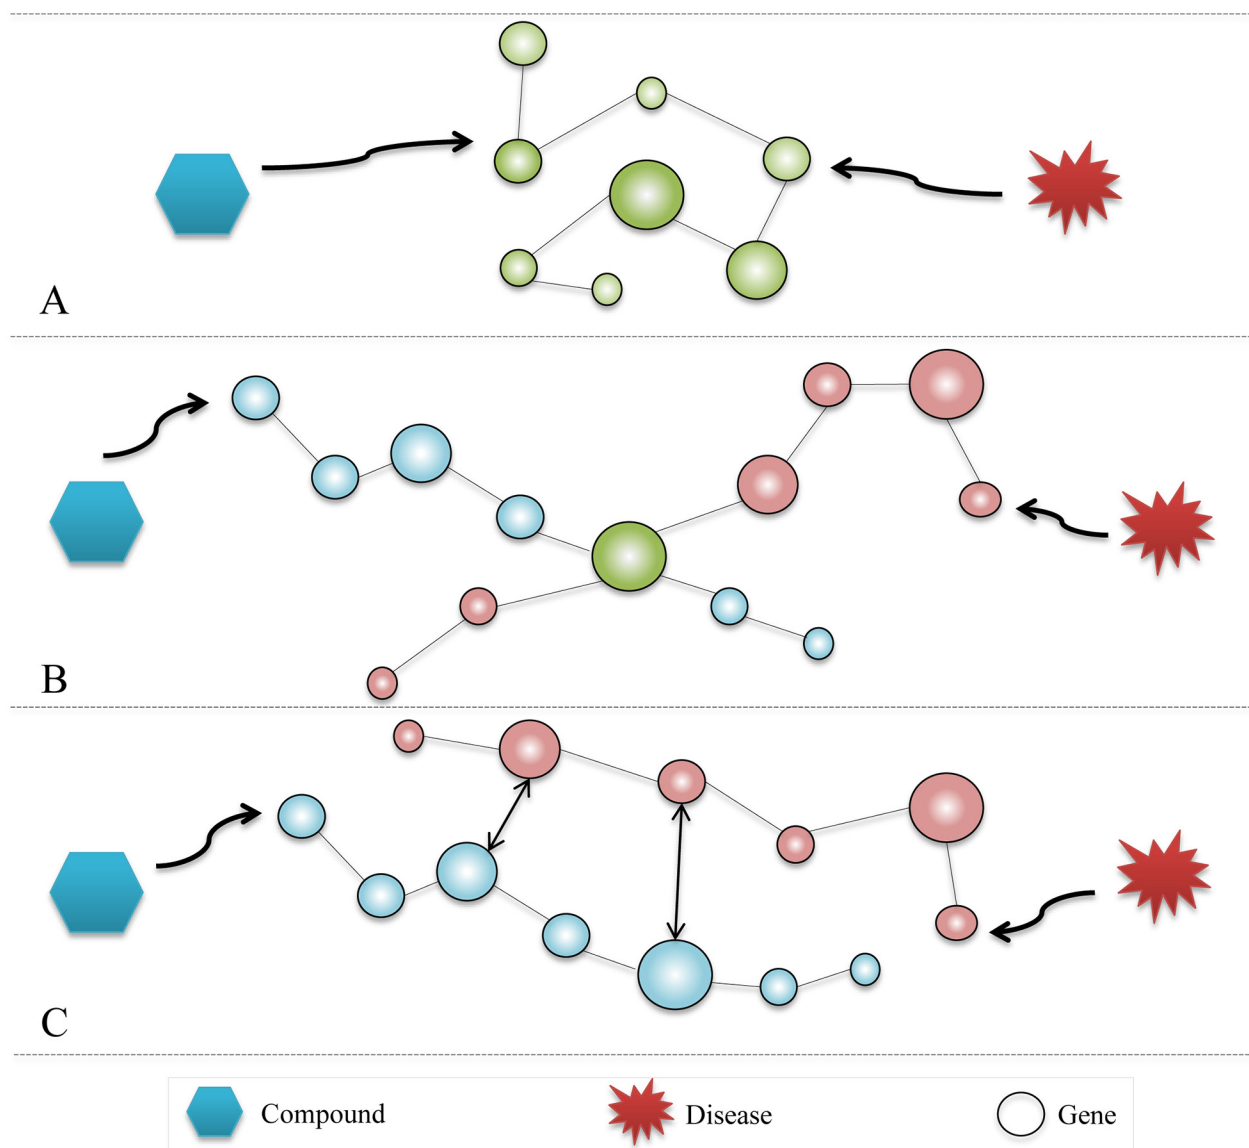

**Supplementary Figure 1: Three types of linking pathways.** (A) Common pathways (the two pathways are the same one); (B) Cross-talking pathways (the two pathways share at least one gene); (C) Interacting pathways (there are protein interactions between the two pathways).

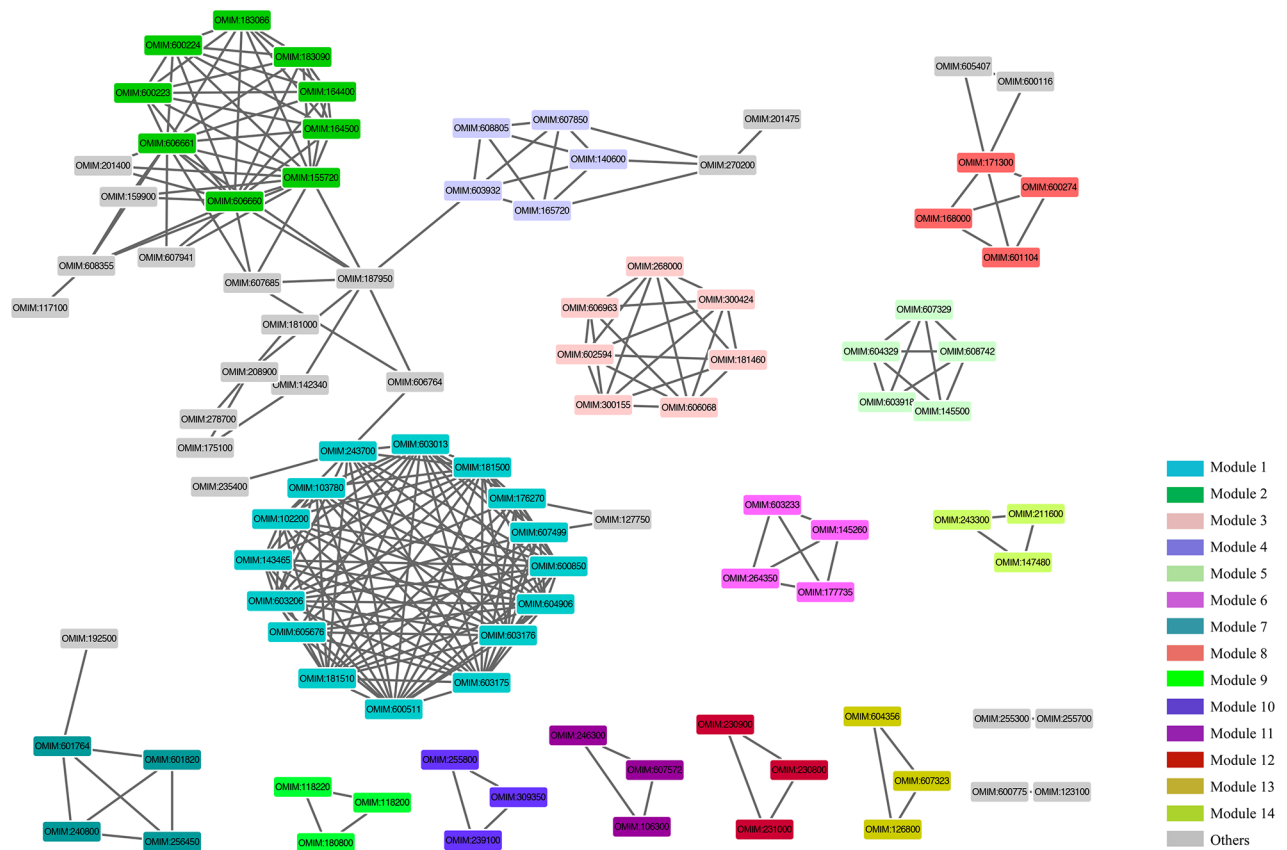

**Supplementary Figure 2: Disease-disease associated network.** Two diseases were linked if they shared at least one linking pathway where the color of disease were marked based on different modules calculated by MCODE.

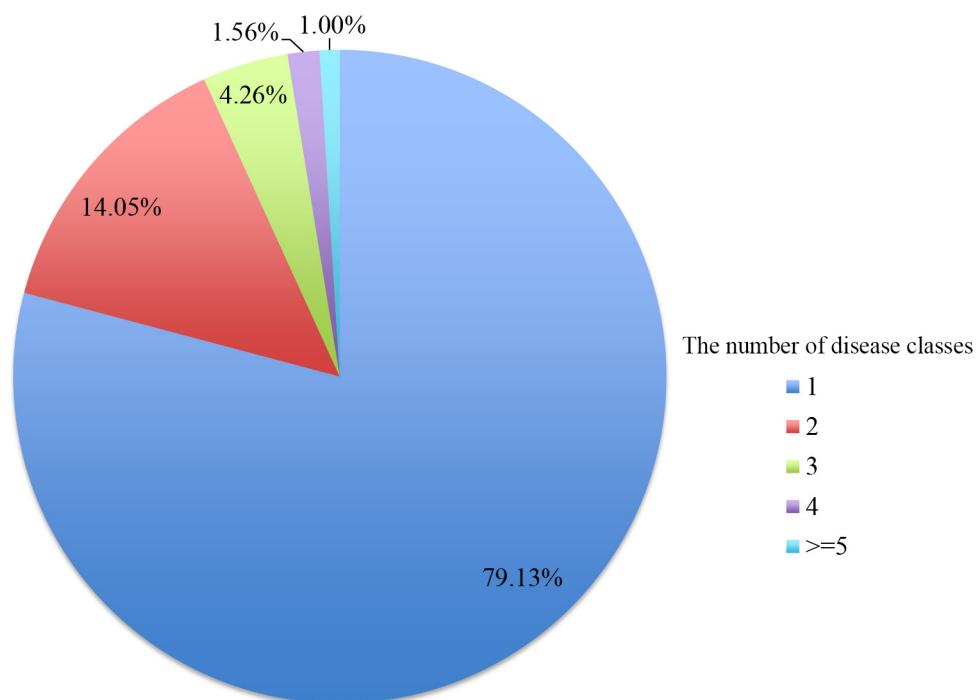

**Supplementary Figure 3: The distribution of linking pathways that associated with disease classes.** The color represents the number of disease classes.

**Supplementary Table 1: 156 compounds of LDW with target information.** The first column represents the PubChem CID of the compound and the second column denotes the corresponding target information.

See Supplementary File 1

**Supplementary Table 2: The detailed information about the modules detected in disease network with MCODE.**

See Supplementary File 2

**Supplementary Table 3: The predicted diseases associated with LDW.** Green: the well accepted diseases associated with LDW; Red: the disease identified in Li *et al* paper which was a paper specialized with LDW; Blue: the diseases identified with LDW based on text mining; Black: Not available associations with LDW.

See Supplementary File 3

**Supplementary Table 4: The novel indications of all the compounds with corresponding scores.**

See Supplementary File 4
